# Supplementary figures and images for: Breath gas metabolites and bacterial metagenomes from cystic fibrosis airways indicate active pH neutral 2,3-butanedione fermentation
Source: PubMed Central journal article supplement — ISME J. 2014 Jan 9;8(6):1247–58. doi: 10.1038/ismej.2013.229 (PMC4030226; doi:10.1038/ismej.2013.229), 2014-01-09

A

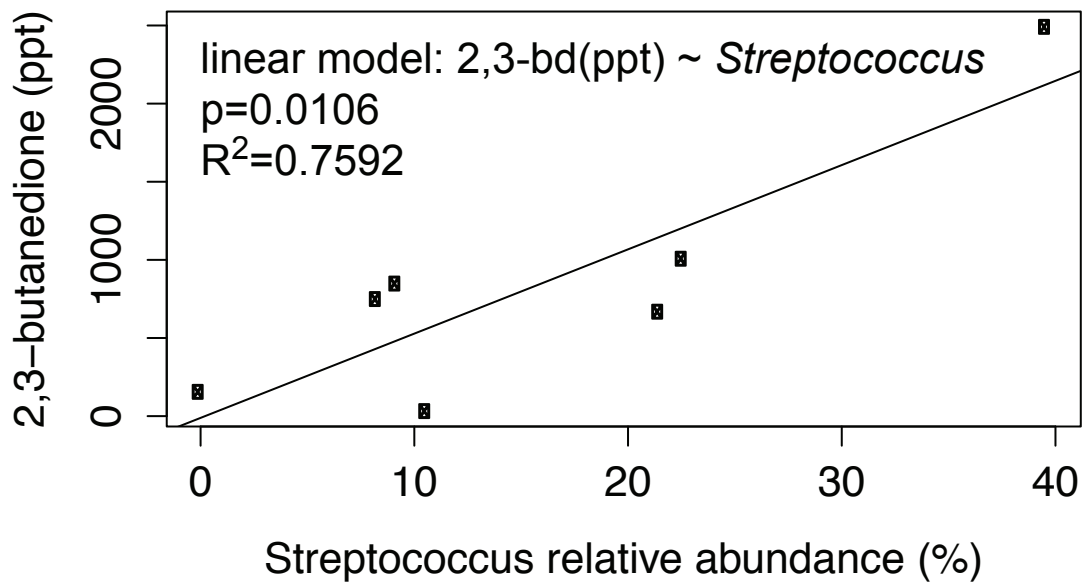

B

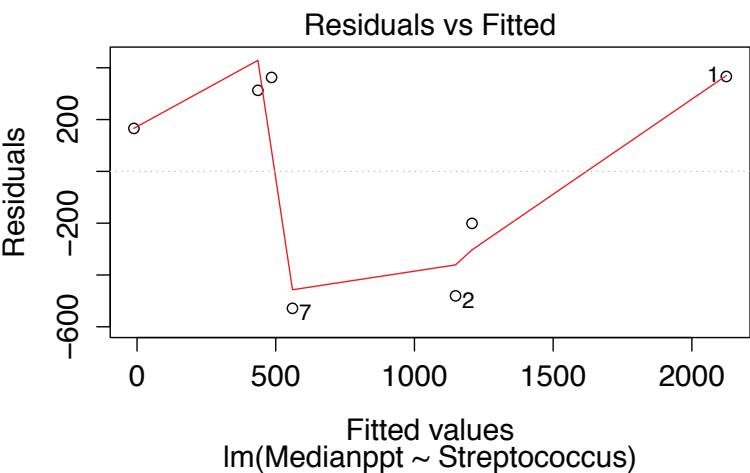

C

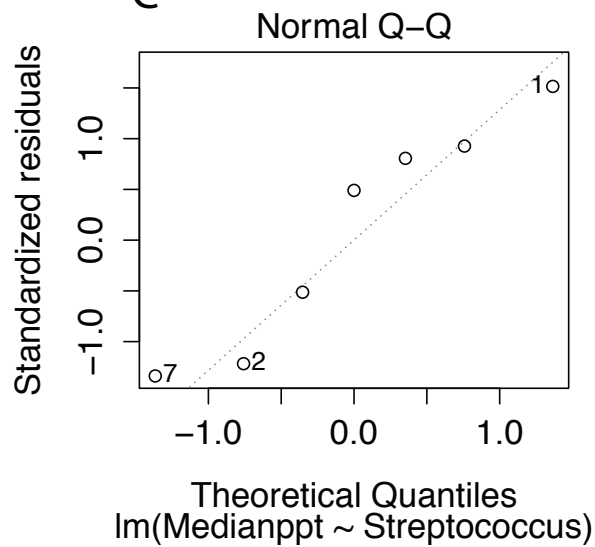

Supplement: ismej2013229x4.pdf [file ismej2013229x4.pdf]
